# Supplementary material for: The Emergence and Dynamics of Tick-Borne Encephalitis Virus in a New Endemic Region in Southern Germany
Source: MDPI journal article supplement (doi:10.3390/microorganisms10112125), 2022-10-27
Supplement: s1 [file microorganisms-1892497-suppl. Table S1.xlsx]

## Sheet: Sheet1
id	name	display_name	clade	location	country	district	year	is_root	this_paper	latitude	longitude
X75286	Hypr	X75286 Moravia 1953	NA	Moravia	CZK	Moravia	1953	FALSE	FALSE
KC292218	2215	KC292218 Regensburg 2011	5	Regensburg	GER	Bavaria	2011	FALSE	FALSE
MH704558	D17/1556	MH704558 Foret de la Robertsau 2017	5	Foret de la Robertsau	FRA	Elsass	2017	FALSE	FALSE
AF091017	Scharl	AF091017 Neunkirchen 1958	NA	Neunkirchen	AUT	Lower Austria	1958	FALSE	FALSE
KC154187	HM329/11	KC154187 Haselmuehl 2011	NA	Haselmuehl	GER	Bavaria	2011	FALSE	FALSE
U27495	Neudoerfl	U27495 Neudoerfl 1971	NA	Neudoerfl	AUT	Lower Austria	1971	FALSE	FALSE
AF091018	Stara Ves	AF091018 Stara Ves	NA	Stara Ves	CRO	Krapina-Zagorje		FALSE	FALSE
KC154199	A104	KC154199 Kleinsemmering 1990	4	Kleinsemmering	AUT	Steiermark	1990	FALSE	FALSE
MH704562	EM/13	MH704562 Emmendingen 2013	4	Emmendingen	GER	Baden-Württemberg	2013	FALSE	FALSE
JF501452	HM666/09	JF501452 Haselmuehl II 2009	4	Haselmuehl II	GER	Bavaria	2009	FALSE	FALSE
MT181025	RNKC4A5N9	MT181025 Odenwald hills 2012	4	Odenwald hills	GER	Hessen	2012	FALSE	FALSE
MH704560	D16/414	MH704560 Auchbachstrasse 2016	4	Auchbachstrasse	GER	Baden-Württemberg	2016	FALSE	FALSE
AF091010	K23	AF091010 Karlsruhe 1975	NA	Karlsruhe	GER	Baden-Württemberg	1975	FALSE	FALSE
HM468145	LU Ebikon	HM468145 Ebikon 2009	3	Ebikon	CH	Luzern	2009	FALSE	FALSE
DZIF19-677	DZIF19_677	DZIF19-677 Spiesberg 2019	3	Spiesberg	GER	Baden-Württemberg	2019	FALSE	TRUE	47.7003	9.73669
HM468191	RuetiZH	HM468191 Rueti 2009	2	Rueti	CH	Zurich	2009	FALSE	FALSE
EU872052	T1354	EU872052 Muehldorf 2006	2	Muehldorf	GER	Bavaria	2006	FALSE	FALSE
KJ922516	Vlasaty	KJ922516 Vlasaty 1953	1	Vlasaty	CZK	Bohemia	1953	TRUE	FALSE
MH704563	D18/26	MH704563 Auchbachstrasse 2018	1	Auchbachstrasse	GER	Baden-Württemberg	2018	FALSE	FALSE
MH704559	D17/951	MH704559 Schiltach 2017	1	Schiltach	GER	Baden-Württemberg	2017	FALSE	FALSE
AF091007	Alsace_1	AF091007 Alsace 1975	1	Alsace	FRA	Elsass	1975	FALSE	FALSE
JF501406	8641	JF501406 Rabyne 1977	1	Rabyne	CZK	Bohemia	1977	FALSE	FALSE
HM468138	BE Spiez Auwald	HM468138 Spiez 2009	6	Spiez	CH	Bern	2009	FALSE	FALSE
LCD191	Wilhelmsdorf	LCD191 Wilhelmsdorf 2021	6	Wilhelmsdorf	GER	Baden-Württemberg	2021	FALSE	TRUE	47.8774	9.43962
LCD189	Wilhelmsdorf	LCD189 Wilhelmsdorf 2021	6	Wilhelmsdorf	GER	Baden-Württemberg	2021	FALSE	TRUE	47.8774	9.43962
MT181024	RNKF7A2N1	MT181024 Odenwald hills 2012	7	Odenwald hills	GER	Hessen	2012	FALSE	FALSE
DZIF20-987	DZIF20_987	DZIF20-987 Flappach 2020	7	Flappach	GER	Baden-Württemberg	2020	FALSE	TRUE	47.7466	9.63061
DZIF20-838	DZIF20_838	DZIF20-838 Furt 2020	7	Furt	GER	Baden-Württemberg	2020	FALSE	TRUE	47.717	9.60876
HM468142	LU Dagmarsellen1	HM468142 Dagmarsellen 2009	8	Dagmarsellen	CH	Luzern	2009	FALSE	FALSE
MH704555	MP16/12	MH704555 Zwiefalten 2016	8	Zwiefalten	GER	Baden-Württemberg	2016	FALSE	FALSE
DZIF20-711	DZIF20_711	DZIF20-711 Leupolz 2020	9	Leupolz	GER	Baden-Württemberg	2020	FALSE	TRUE	47.7627	9.83064
DZIF17-2221	DZIF17_2221	DZIF17-2221 Karsee 2017	9	Karsee	GER	Baden-Württemberg	2017	FALSE	TRUE	47.7462	9.80581
DZIF20-715	DZIF20_715	DZIF20-715 Leupolz 2020	9	Leupolz	GER	Baden-Württemberg	2020	FALSE	TRUE	47.7627	9.83064
DZIF18-1484	DZIF18_1484	DZIF18-1484 Karbach 2018	9	Karbach	GER	Baden-Württemberg	2018	FALSE	TRUE	47.6975	9.79852
DZIF18-1505	DZIF18_1505	DZIF18-1505 Wangen 2018	9	Wangen	GER	Baden-Württemberg	2018	FALSE	TRUE	47.6992	9.81622
