# Supplementary material for: The Emergence and Dynamics of Tick-Borne Encephalitis Virus in a New Endemic Region in Southern Germany
Source: MDPI journal article supplement (doi:10.3390/microorganisms10112125), 2022-10-27
Supplement: s1 [file s1]

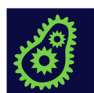

## Supplementary materials

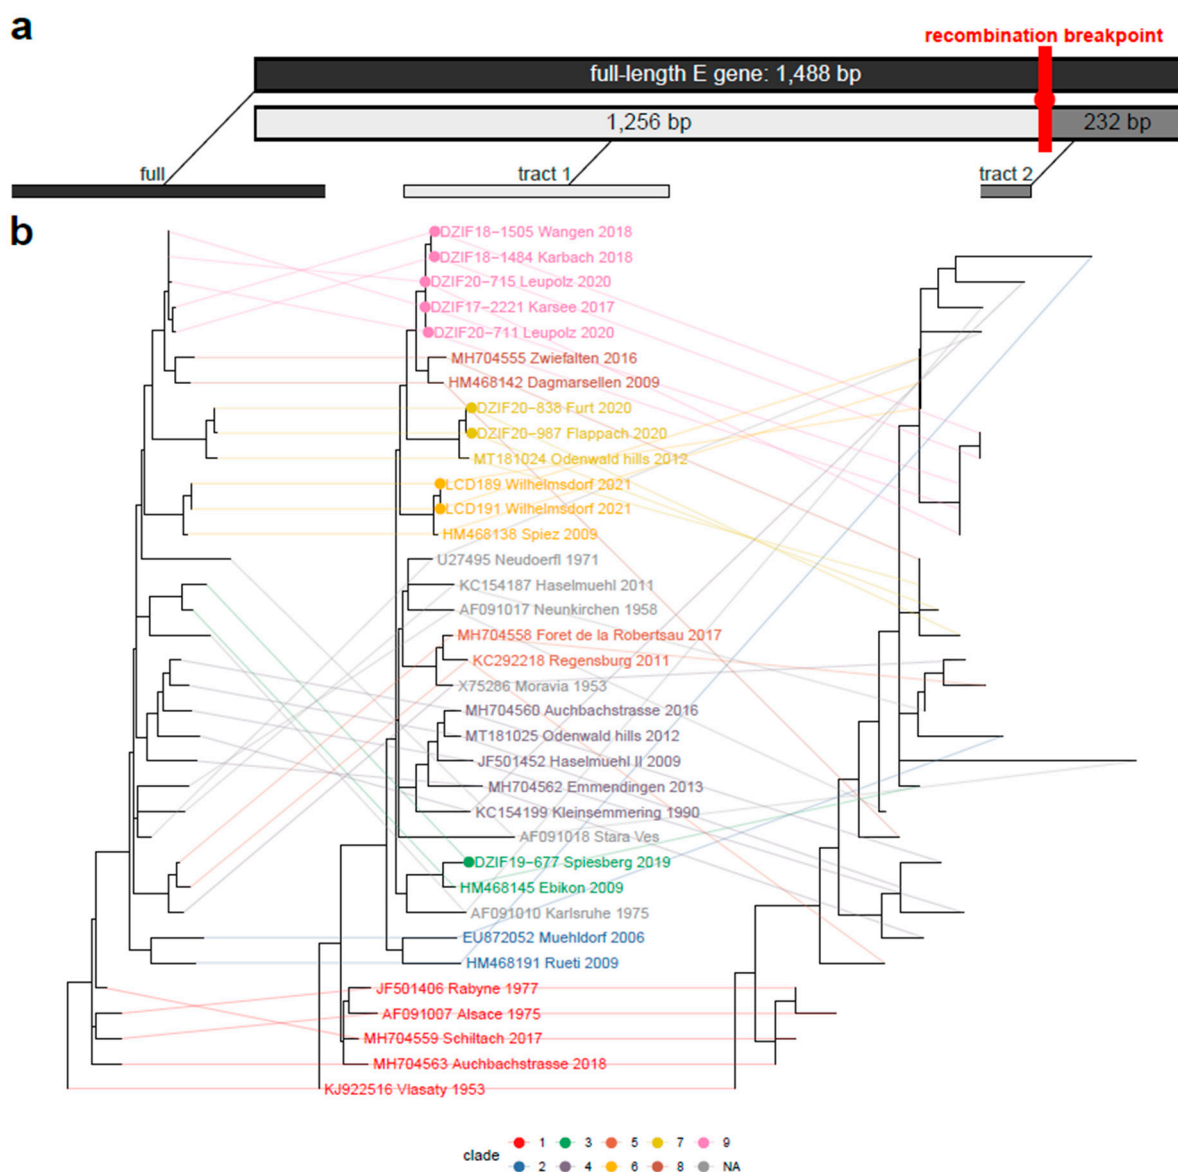

**Figure S1.** Extended version of Figure 4 includes (b) the tree topology based on the phylogenetic analysis of the full-length MSA (using the same methods as for (a) regions 1 and 2; applied optimal model: TN93 + G, AIC=8878).
